# Supplementary material
Source: Research Square preprint supplement (doi:10.21203/rs.3.rs-9118764/v1)
Supplement: Supplementary file 1 [file 154509c7a36c6000b072da65.docx]

Supplementary Figure S1a. Correlation matrix showing perfect agreement (r = 1.00) between WQI values calculated using Primary, Proportional, and Equal weighting schemes, confirming robustness of WQI calculations to parameter weight choices.
