# Supplementary material
Source: Research Square preprint supplement (doi:10.21203/rs.3.rs-9118764/v1)
Supplement: Supplementary file 3 [file c48d1bfba81d9e0feeb73ac2.docx]

Supplementary Figure S1b. Sensitivity analysis of variance partitioning to parameter weighting schemes. Venn diagrams show variance explained by spatial (X1), temporal (X2), anthropogenic (X3), and climate (X4) factors under Primary, Proportional, and Equal weighting schemes. Temporal factors (X2) consistently explain the most variance (~5.6-5.9%) across all schemes, confirming robustness of main findings.
